# Supplementary material
Source: PubMed Central journal article supplement (PMC2889519)
Supplement: 1000328107_pnas.201000328SI.pdf [file 1000328107_pnas.201000328SI.pdf]

# Supporting Information

Lewis et al. 10.1073/pnas.1000328107

## SI Materials and Methods

**Plasmid Construction.** DIM-7 CDS FP and RP plus DIM-7 UTR FP and RP primers were used to amplify the *dim-7* coding sequence and 3'UTR, respectively, to make the knock-in 3XFLAG-tagged construct as described (1). DIM-7-NotIFP and DIM-7-PacI-RP were used to amplify *dim-7* from genomic DNA and clone this construct into the pCCG::C-3XFLAG plasmid digested with NotI and PacI. pCCG::C-3XFLAG includes a 3XFLAG tag and sequences for *his-3* targeting to create a DIM-7-3XFLAG plasmid. We note that the *ccg-1* promoter has been deleted and the DIM-7-3XFLAG construct is under control of its native promoter. DIM-7-XbaI-FP and DIM-7-PacI-RP were used to amplify most of the coding sequence into a pCR2.1 vector (Invitrogen) to generate the DIM-7-Xba-Pac plasmid for constructing mutant versions of the DIM-7 protein. DIM-7 deletion mutants were obtained by performing inverse PCR using delta NT domain primers P1 and P2, or delta ZF primers P1 and P2, and the DIM-7-Xba-Pac plasmid as a template. The resulting linear PCR

product was subject to blunt end ligation and transformed into *Escherichia coli* to generate the plasmid containing a mutant, truncated DIM-7 sequence. The DIM-7 C579G mutant was constructed by performing Quickchange (Stratagene) site directed mutagenesis using the C579G P1 and P2, plus the DIM-7-Xba-Pac plasmid as a template. The mutated *dim-7* sequences were then subcloned into the DIM-7-3XFLAG plasmid using the XbaI and PacI sites to generate full-length, FLAG-tagged, mutant DIM-7 constructs.

The *his-3* FP and RP primers, *his-3*flank fp and rp primers, and the *dim-5*-*his3*\_fp and *dim-5*\_gly\_rp primers were used to amplify *his-3* coding sequence, *his-3* flanking sequence, and *dim-5*, respectively, from genomic DNA. *E. coli* Dam was amplified from plasmid pMyc-Dam ([http://research.nki.nl/vansteensellab/DamIDinfo/DrosophilaDamID/Plasmids/Drosophila\\_plasmids.htm](http://research.nki.nl/vansteensellab/DamIDinfo/DrosophilaDamID/Plasmids/Drosophila_plasmids.htm)) using C\_dam\_fp and C\_dam\_hisflank\_rp primers. A plasmid containing the DIM-5-Dam fusion with *his-3* targeting sequences was assembled by yeast in vivo recombination with pRS416 as described (2).

1. Honda S, Selker EU (2009) Tools for fungal proteomics: multifunctional neurospora vectors for gene replacement, protein expression and protein purification. *Genetics* 182(1):11–23.

2. Colot HV, et al. (2006) A high-throughput gene knockout procedure for *Neurospora* reveals functions for multiple transcription factors. *Proc Natl Acad Sci USA* 103: 10352–10357.

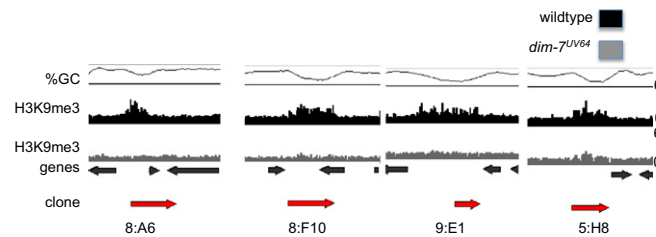

**Fig. S1.** H3K9me3 enrichment at previously identified methylated regions. ChIP-chip data from four representative control regions are shown [Selker EU, et al. (2003) The methylated component of the *Neurospora crassa* genome. *Nature* 422:893–897]. The base composition (%GC) is plotted as the moving average at the top of each plot. ChIP-chip data for WT (black) and the *dim-7<sup>UV64</sup>* strain (gray) are shown as enrichment values [H3K9me3 IP/input] indicated on the y axis. The positions of predicted ORFs (genes) and the previously identified methylated DNA clones (red), with their identification numbers, are shown at the bottom.

**A**

Mass: 36003.73018 pl: 6.08 Coverage: 40.57%

EKAFRPHFF NHGKPDIRSF ATHAQLPISI VNREDDAFLN PNFRFIDHSI I GKNVFPVADQ SFRVGCSCAS DEECMYSTCQ CLDEMAPDSD EADPYTRKK  
 FAYYSOGAK KGLLRDRVLQ SQEPIYECHQ GCACSKDCPN RVVERGRTPV LQIFRTDRG WGVKCPVNIK RQGFVDRILG EITTEADRR RRAESTIARR  
 DVYLFALOK FSDPDSLDFL LAGQPLEVDG EYMSGPTRFI NHCSDPNMAI FARVGDHADK HHDLDLFAI KDIPKSTELT FDVVNGLTGL ESDAHDPSKI  
 EMTKCLCGT AKCRGYL

**B**

Mass: 74193.0550800001 pl: 8.02 Coverage: 31.47%

MAGPGRPRRR RGSSASIDST DRRRRRTRE LAILKPVTGP TSDDLWPYFA VLTDATIYQK DGKTLANPLH VDLEGGFFIVR GKLEPVEDGD DEARCFHPK  
 YNKATYIEIS RSERYSIGYE PNTLWVSGAS GWFEIIPSRK YETMYNEVME AITLYYING PYEEHKRLK KADKKRRKDV KPPSLDEIFF SYALTAGDGA  
 VTVKEVEAR CLKWAQFLLA HFFKESIRW QDTGFAAWLQ SARPDLQKI SDVAAGLLTK PAEPEGLLA RDDSPQPOS LAIREPPKGG RTTRTSRQAS  
 ELSQSRSDGK RGIAROSPVE TPIAPVSNR HLSSSSPRPR ASPAVITGSD DLPDOPVDR L I VLLGEVAQR IDIKTVMSK INSDLFYNCR IKYNAAREL  
 CEHFASDLE RLPPMWDNTP YRAWLEDVVE NGRPAPVEFV VEDIPOYLTR RTRRQTHISR LSSALGPTPS VEESKDEVR AGKQPRVGRP SGKVATLRVA  
 GSKFLASDMI DEDELPPRRG RKALKRTRV EDEDSDANS VIIDMTDNTG VIFKDAVRIV VQAEPLPTMS PAGPNGTWC DQEGCNVYVR SADEPEGQDL  
 ISKHFKDHEE QAQKINLAME ESSHSHLLDK IQAMGNLAA KKRGSINGEP LPLPIKRLL

**Fig. S2.** Peptide coverage obtained for DIM-5 and DIM-7. Peptides identified by mass spectrometry following purification of DIM-5 are shown highlighted in red on the primary amino acid sequence for (A) DIM-5 and (B) DIM-7. Complete proteomic analysis of DIM-5-interacting proteins and detailed methods will be described elsewhere. The predicted molecular weight and isoelectric point, as well as the percent of the total protein covered by the identified peptides, is shown.



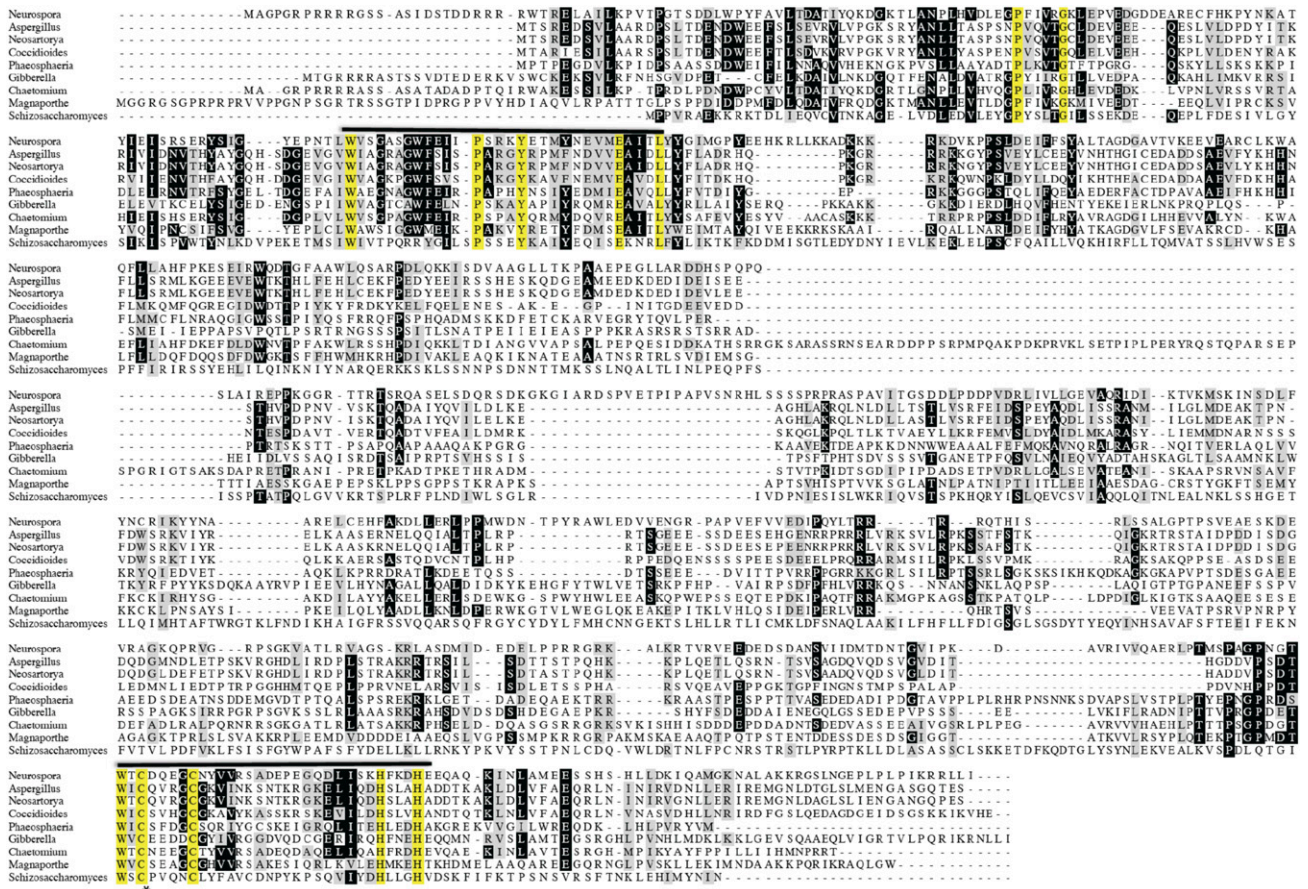

**Fig. S4.** Alignment of DIM-7 protein sequences from several filamentous fungi. ClustalW alignment of the predicted DIM-7 protein sequences from *Aspergillus fumigatus* (*Aspergillus*)(XP\_001481513), *Phaeosphaeria nodorum* (*Phaeosphaeria*) (XP\_001800529), *Gibberella zeae* (*Gibberella*)(XP\_387503), *Chaetomium globosum* (*Chaetomium*)(XP\_001224793), *Neurospora crassa* (*Neurospora*)(XP\_961308), *Magnaporthe grisea* (*Magnaporthe*)(XP\_363041), *Neosartorya fischeri* (*Neosartorya*)(XP\_001259468), and *Coccidioides immitis* (*Coccidioides*)(XP\_001239633), plus Raf2p from *Schizosaccharomyces pombe* (CAA20700). The region deleted in the N-terminal domain deletion allele ( $\Delta$ NT) is indicated by a black line above the deleted sequence (W124–L153). The region deleted in the zinc finger-domain deletion allele ( $\Delta$ ZF) is also indicated by a black line above the deleted sequence (W577 to H607). An asterisk indicates Cysteine 579, which was mutated to a Glycine.

**Table S1. Reversion frequency of selectable markers**

| Medium             | Strain→<br>Number of conidia plated | N1674<br>Number of colonies* | N2984<br>Number of colonies* |
|--------------------|-------------------------------------|------------------------------|------------------------------|
| No drug            | 10 <sup>5</sup>                     | Lawn <sup>†</sup>            | Lawn <sup>†</sup>            |
|                    | 5 X 10 <sup>5</sup>                 | Lawn                         | Lawn                         |
|                    | 5 X 10 <sup>6</sup>                 | Lawn                         | Lawn                         |
|                    | 10 <sup>7</sup>                     | Lawn                         | Lawn                         |
| Hygromycin         | 10 <sup>5</sup>                     | 2, 3, 1                      | 1, 0, 1                      |
|                    | 5 X 10 <sup>5</sup>                 | 10, 8, 7                     | 5, 8, 7                      |
|                    | 5 X 10 <sup>6</sup>                 | 80, 55, 70                   | 55, 75, 65                   |
| Basta              | 10 <sup>5</sup>                     | No colonies*                 | 0, 1, 3                      |
|                    | 5 X 10 <sup>5</sup>                 | No colonies*                 | 8, 10, 7                     |
|                    | 5 X 10 <sup>6</sup>                 | No colonies*                 | 40, 55, 48                   |
| Hygromycin + Basta | 10 <sup>5</sup>                     | No colonies                  | 0, 0, 0                      |
|                    | 5 X 10 <sup>5</sup>                 | No colonies                  | 0, 0, 0                      |
|                    | 5X 10 <sup>6</sup>                  | No colonies                  | 1, 0, 2                      |
|                    | 10 <sup>7</sup>                     | No colonies                  | 3, 4, 1                      |

\*Numbers separated by commas indicate the number of colonies/plate for three replicate plating experiments.

<sup>†</sup>Lawn indicates that a lawn of colonies was obtained when the indicated number of conidia were plated on nonselective medium (No drug).

**Table S2. Strains used in the present study**

| Strain     | Genotype                                                                                                                                                                                                                                                                                | Reference     |
|------------|-----------------------------------------------------------------------------------------------------------------------------------------------------------------------------------------------------------------------------------------------------------------------------------------|---------------|
| N150       | Wild type                                                                                                                                                                                                                                                                               | (1)           |
| N1674      | <i>am</i> <sup>132</sup> <i>lys-1 inl::am</i> <sup>RIP</sup> - <i>hph</i> <sup>m</sup> - <i>am</i> <sup>RIP</sup>                                                                                                                                                                       | (2)           |
| N2984      | <i>his-3</i> <sup>RIP</sup> :: <i>bar</i> <sup>M</sup> - <i>his-3</i> <sup>RIP</sup> ; <i>am</i> <sup>132</sup> <i>inl::am</i> <sup>RIP</sup> - <i>hph</i> <sup>m</sup> - <i>am</i> <sup>RIP</sup> <i>a</i>                                                                             | Present study |
| N3101      | <i>ΔinlA</i>                                                                                                                                                                                                                                                                            | Gift*         |
| N2977      | <i>his-3</i> <sup>RIP</sup> :: <i>bar</i> <sup>M</sup> - <i>his-3</i> <sup>RIP</sup> ; <i>am</i> <sup>132</sup> <i>Δinl::am</i> <sup>RIP</sup> - <i>hph</i> <sup>m</sup> - <i>am</i> <sup>RIP</sup> <i>a</i>                                                                            | Present study |
| N3074      | <i>Δdim-5 trp-2</i>                                                                                                                                                                                                                                                                     | (3)           |
| N1851      | <i>Δdim-2</i>                                                                                                                                                                                                                                                                           | (4)           |
| N3311      | <i>Sad-1 his-3</i> <sup>RIP</sup> :: <i>bar</i> <sup>M</sup> - <i>his-3</i> <sup>RIP</sup> ; <i>am</i> <sup>132</sup> <i>Δinl::am</i> <sup>RIP</sup> - <i>hph</i> <sup>m</sup> - <i>am</i> <sup>RIP</sup> <i>A</i>                                                                      | Present study |
| N3854      | <i>his-3</i> <sup>RIP</sup> :: <i>bar</i> <sup>M</sup> - <i>his-3</i> <sup>RIP</sup> ; <i>am</i> <sup>132</sup> <i>inl::am</i> <sup>RIP</sup> - <i>hph</i> <sup>m</sup> - <i>am</i> <sup>RIP</sup> <i>a</i> ; ; <i>Bml</i> :: <i>dim-2kd</i>                                            | Present study |
| N3312      | <i>his-3</i> <sup>RIP</sup> :: <i>bar</i> <sup>M</sup> - <i>his-3</i> <sup>RIP</sup> ; <i>am</i> <sup>132</sup> <i>inl, dim-7</i> <sup>UV64</sup> :: <i>am</i> <sup>RIP</sup> - <i>hph</i> <sup>m</sup> - <i>am</i> <sup>RIP</sup> <i>a</i>                                             | Present study |
| N3866      | <i>his-3</i> <sup>RIP</sup> :: <i>bar</i> <sup>M</sup> - <i>his-3</i> <sup>RIP</sup> ; <i>am</i> <sup>132</sup> <i>inl, dim-7</i> <sup>UV30</sup> :: <i>am</i> <sup>RIP</sup> - <i>hph</i> <sup>m</sup> - <i>am</i> <sup>RIP</sup> <i>a</i>                                             | Present study |
| N3867      | <i>his-3</i> <sup>RIP</sup> :: <i>bar</i> <sup>M</sup> - <i>his-3</i> <sup>RIP</sup> ; <i>am</i> <sup>132</sup> <i>inl, dim-7</i> <sup>UV68</sup> :: <i>am</i> <sup>RIP</sup> - <i>hph</i> <sup>m</sup> - <i>am</i> <sup>RIP</sup> <i>a</i>                                             | Present study |
| N3868      | <i>his-3</i> <sup>RIP</sup> :: <i>bar</i> <sup>M</sup> - <i>his-3</i> <sup>RIP</sup> ; <i>am</i> <sup>132</sup> <i>inl, dim-7</i> <sup>UV64</sup> :: <i>am</i> <sup>RIP</sup> - <i>hph</i> <sup>m</sup> - <i>am</i> <sup>RIP</sup> <i>a</i> :: <i>Bml</i> ; ; <i>dim-7</i> <sup>+</sup> | Present study |
| FGSC 14210 | <i>Δdim-7::hph</i> <sup>+</sup> heterokaryon <i>a</i>                                                                                                                                                                                                                                   | (5)           |
| N3855      | <i>Sad-1 Δdim-7::hph</i> <sup>+</sup> <i>A</i>                                                                                                                                                                                                                                          | Present study |
| N3856      | <i>Δdim-7::hph</i> <sup>+</sup> <i>a</i>                                                                                                                                                                                                                                                | Present study |
| N3857      | <i>dim-7</i> <sup>+</sup> :: <i>dim-7-flag</i> - <i>hph</i>                                                                                                                                                                                                                             | Present study |
| N3316      | <i>dim-5</i> <sup>+</sup> :: <i>dim-5-3×HA</i> - <i>hph</i>                                                                                                                                                                                                                             | Present study |
| N3858      | <i>dim-7</i> <sup>+</sup> :: <i>dim-7-3×flag-hph</i> ; <i>dim-5</i> <sup>+</sup> :: <i>dim-5-3×ha-hph</i>                                                                                                                                                                               | Present study |
| N3859      | <i>his-3</i> <sup>+</sup> :: <i>dim-7-3×flag</i> ; <i>Adim-7</i>                                                                                                                                                                                                                        | Present study |
| N3860      | <i>his-3</i> <sup>+</sup> :: <i>dim-7ΔZF-3×flag</i> ; <i>Adim-7</i>                                                                                                                                                                                                                     | Present study |
| N3861      | <i>his-3</i> <sup>+</sup> :: <i>dim-7C579G-3×flag</i> ; <i>Δdim-7</i>                                                                                                                                                                                                                   | Present study |
| N3862      | <i>his-3</i> <sup>+</sup> :: <i>dim-7ΔNT-3×flag</i> ; <i>Δdim-7</i>                                                                                                                                                                                                                     | Present study |
| N3863      | <i>his-3</i> <sup>+</sup> :: <i>dim-5-dam</i> ; <i>Δdim-5::bar</i> <sup>+</sup>                                                                                                                                                                                                         | Present study |
| N3864      | <i>his-3</i> <sup>+</sup> :: <i>dim-5-dam</i>                                                                                                                                                                                                                                           | Present study |

\*Generously provided by Rodolfo Aramayo, Texas A&M University, College Station, TX.

- Galagan JE, et al. (2003) The genome sequence of the filamentous fungus *Neurospora crassa*. *Nature* 422:859–868.
- Irelan JT, Selker EU (1997) Cytosine methylation associated with repeat-induced point mutation causes epigenetic gene silencing in *Neurospora crassa*. *Genetics* 146:509–523.
- Lewis ZA, et al. (2009) Relics of repeat-induced point mutation direct heterochromatin formation in *Neurospora crassa*. *Genome Res* 19:427–437.
- Kouzminova EA, Selker EU (2001) *dim-2* encodes a DNA methyltransferase responsible for all known cytosine methylation in *Neurospora*. *EMBO J* 20:4309–4323.
- Colot HV, et al. (2006) A high-throughput gene knockout procedure for *Neurospora* reveals functions for multiple transcription factors. *Proc Natl Acad Sci USA* 103:10352–10357.
